# Supplementary material for: Clinical Practice Guideline for Percutaneous Endoscopic Gastrostomy
Source: PubMed Central journal article supplement — Gut Liver. 2023 Oct 18;18(1):10–26. doi: 10.5009/gnl230146 (PMC10791499; doi:10.5009/gnl230146), 2023-10-18
Supplement: gnl-18-1-10-supple.pdf [file gnl-18-1-10-supple.pdf]

**Supplementary Table 1.** Committee for the Development of Clinical Practice Guidelines for Percutaneous Endoscopic Gastrostomy

| Title        | Name           | Institution                                              | Comments                                                                                                                 |
|--------------|----------------|----------------------------------------------------------|--------------------------------------------------------------------------------------------------------------------------|
| Team leader  | Moon Kyung Joo | Korea University College of Medicine                     |                                                                                                                          |
| Co-secretary | Chung Hyun Tae | Ewha Womans University College of Medicine               |                                                                                                                          |
| Co-secretary | Ju Yup Lee     | Keimyung University School of Medicine                   |                                                                                                                          |
| Member       | Chan Hyuk Park | Hanyang University College of Medicine                   |                                                                                                                          |
| Member       | Eun Jeong Gong | Hallym University College of Medicine                    |                                                                                                                          |
| Member       | Cheol Min Shin | Seoul National University Bundang Hospital               |                                                                                                                          |
| Member       | Hyun Lim       | Hallym University College of Medicine                    |                                                                                                                          |
| Member       | Hyuk Soon Choi | Korea University College of Medicine                     |                                                                                                                          |
| Member       | Sang Hoon Kim  | Dongguk University Ilsan Hospital                        | Korean College of <i>Helicobacter</i> and Upper Gastrointestinal Research–Metabolism, Obesity & Nutrition Research Group |
| Member       | Chul Hyun Lim  | College of Medicine, The Catholic University of Korea    | Korean Society of Gastrointestinal Endoscopy–The Research Group for Endoscopes and Devices                               |
| Consultant   | Miyoung Choi   | National Evidence-based Health Care Collaborating Agency | Expert methodologist                                                                                                     |

**Supplementary Table 2.** Summary of Evidence for Prophylactic Antibiotics

| First author  | Publication year | Country     | Study period | Population (adults vs children) | Major indications for PEG                                  | Number of participants | PEG method | IV antibiotics                            | Control        | Follow-up, day | Antibiotics-related adverse event (n)                                                                                                |
|---------------|------------------|-------------|--------------|---------------------------------|------------------------------------------------------------|------------------------|------------|-------------------------------------------|----------------|----------------|--------------------------------------------------------------------------------------------------------------------------------------|
| Jonas         | 1985             | USA         | 1982–1984    | NA                              | Swallowing dysfunction, head and neck cancer               | 33                     | Pull       | Cefoxitin                                 | Placebo        | ≥4             | NA                                                                                                                                   |
| Jain          | 1987             | USA         | 1984–1986    | NA                              | Swallowing dysfunction, oropharyngeal cancer               | 55                     | Pull       | Cefazolin                                 | Placebo        | 2 - 7          | NA                                                                                                                                   |
| Akkersdijk    | 1995             | Netherlands | NA           | NA                              | Swallowing dysfunction, oropharyngeal cancer               | 69                     | Pull       | Amoxicillin/<br>Clavulanic acid           | No antibiotics | 30             | NA                                                                                                                                   |
| Sturgis       | 1996             | USA         | 1994–1995    | NA                              | Neurological diseases, malignancy                          | 61                     | Pull       | Cefazolin                                 | Placebo        | 7              | NA                                                                                                                                   |
| Gossner       | 1999             | Germany     | 1993–1995    | NA                              | Swallowing dysfunction, obstruction                        | 307                    | Pull       | Cefotaxime or Piperacillin/<br>Tazobactam | No antibiotics | 7              | NA                                                                                                                                   |
| Preclik       | 1999             | Germany     | NA           | Adults                          | Swallowing dysfunction, oropharyngeal or esophageal cancer | 84                     | Pull       | Amoxicillin/<br>Clavulanic acid           | Placebo        | ≥7             | Antibiotics group: nausea (1), seizure (1)<br>Placebo group: vomiting (1), suspected allergic exanthema (1)<br>NA                    |
| Dormann       | 2000             | Germany     | NA           | Adults                          | Swallowing dysfunction, malignancy                         | 216                    | Pull       | Ceftriaxone                               | No antibiotics | 10             | NA                                                                                                                                   |
| Panigrahi     | 2002             | UK          | NA           | Adults                          | Swallowing dysfunction, malignancy                         | 58                     | Pull       | Amoxicillin/<br>Clavulanic acid           | Placebo        | 7, 28          | NA                                                                                                                                   |
| Ahmad         | 2003             | UK          | NA           | Adults                          | Swallowing dysfunction, oropharyngeal cancer               | 66                     | Pull       | Cefuroxime                                | Placebo        | 7              | Antibiotics group:<br><i>C. difficile</i> -associated diarrhea (3)<br>Placebo group:<br><i>C. difficile</i> -associated diarrhea (0) |
| Saadeddin     | 2005             | UK          | 2001–2003    | Adults                          | Swallowing dysfunction                                     | 83                     | Pull       | Amoxicillin/<br>Clavulanic acid           | Placebo        | ≥7             | NA                                                                                                                                   |
| Radhakrishnan | 2006             | UK          | 1999–2004    | NA                              | Swallowing dysfunction                                     | 62                     | Pull       | Cefuroxime                                | No antibiotics | 7              | NA                                                                                                                                   |
| Shastri       | 2008             | Germany     | 2003–2007    | NA                              | Malignancy                                                 | 93                     | Push       | Ceftriaxone                               | Placebo        | 7              | NA                                                                                                                                   |
| Adachi        | 2016             | Japan       | 2009–2013    | NA                              | Swallowing dysfunction                                     | 90                     | Push       | Ampicillin/<br>Sulbactam                  | Placebo        | 7              | NA                                                                                                                                   |
| Alessandri    | 2021             | Italy       | 2014–2019    | Children                        | Swallowing dysfunction                                     | 49                     | Pull       | Amoxicillin/<br>Clavulanic acid           | Placebo        | 14             | Antibiotics group: none<br>Placebo group: none                                                                                       |

NA, not applicable; *C. difficile*, *Clostridium difficile*.

**Supplementary Table 3.** Summary of Evidence for Timing of Feeding

| First author | Publication year | Country | Study period   | Study design | Definition    |              | Number of participants |              | Follow-up, day | Adverse events, No. (%) | Mortality within 72 hr, No. (%) | Significant increase of residual volume, No. (%) |
|--------------|------------------|---------|----------------|--------------|---------------|--------------|------------------------|--------------|----------------|-------------------------|---------------------------------|--------------------------------------------------|
|              |                  |         |                |              | Early feeding | Late feeding | Early feeding          | Late feeding |                |                         |                                 |                                                  |
| Brwon        | 1995             | USA     | NA             | RCT          | <3 hr         | Next day     | 27                     | 30           | > 14           | 5 [8.8]                 | 0                               | NA                                               |
| Choudhry     | 1996             | USA     | 1993.11–1995.4 | RCT          | <3 hr         | After 24 hr  | 21                     | 20           | 3              | 3 [7.3]                 | 1 [2.4]                         | 3 [7.3]                                          |
| Unni         | 1996             | USA     | NA             | RCT          | <3 hr         | After 24 hr  | 10                     | 10           | 1              | 0                       | NA                              | 0                                                |
| McCarter     | 1998             | USA     | NA             | RCT          | <4 hr         | After 24 hr  | 57                     | 55           | 30             | 12 [10.7]               | 1 [0.9]                         | 19 [17.0]                                        |
| Stein        | 2002             | Germany | 1997.1–1997.12 | RCT          | <1 hr         | After 24 hr  | 40                     | 40           | 3              | 12 [15.0]               | 5 [6.3]                         | 24 [30.0]                                        |

NA, not applicable; RCT, randomized controlled trial.



**Supplementary Table 5.** Summary of Evidence for Type of Gastrostomy Tube (Patients with Upper Aerodigestive Tract Cancers)

| First author | Publication year | Country | Study period        | Population (adults vs children) | Major indications for PEG | Number of participants | Pull method | Push method | PEG metastasis rates                                                    |                                |
|--------------|------------------|---------|---------------------|---------------------------------|---------------------------|------------------------|-------------|-------------|-------------------------------------------------------------------------|--------------------------------|
|              |                  |         |                     |                                 |                           |                        |             |             | Pull method                                                             | Push method                    |
| Siu          | 2020             | USA     | to 2019             | Adults (age ≥18 yr)             | UADT malignancies         | 10,388 from 98 Studies | 7,887       | 2,501       | 0.56%<br>(95% CI: 0.40%-0.79%)                                          | 0.29%<br>(95% CI: 0.15%-0.55%) |
| Fung         | 2017             | USA     | 1/5/2009-12/22/2014 | Adults                          | Head and neck malignancy  | 777                    | 777         | -           | 5 (1 stromal metastasis, 4 radiologically detected either on CT or PET) | -                              |

PEG, percutaneous endoscopic gastrostomy; UADT, upper aerodigestive tract; CI, confidence interval; CT, computed tomography; PET, positron emission tomography.

**Supplementary Table 6.** Summary of Evidence for Endoscopic Treatment of Buried Bumper Syndrome

| First author   | Year | Country | Study period | Study design                         | Number of participants          | Comparison                               | Main outcome                                                                                                                                                                                                                                                                                                                                                                    |
|----------------|------|---------|--------------|--------------------------------------|---------------------------------|------------------------------------------|---------------------------------------------------------------------------------------------------------------------------------------------------------------------------------------------------------------------------------------------------------------------------------------------------------------------------------------------------------------------------------|
| Casper         | 2018 | Germany | 2000–2015    | Retrospective and prospective cohort | Retrospective 25, prospective 4 | NA                                       | Patients with partial buried bumper syndrome were effectively treated by endoscopy in both cohorts (24/25 and 4/4 patients respectively). For complete buried bumper syndrome (Cyrany grade 3) success rates of endoscopic therapy differed significantly between the cohorts ( $p=0.017$ ).                                                                                    |
| Mueller-Gerbes | 2017 | Germany | 2002–2013    | Retrospective cohort                 | 82                              | Bougie, grasp, needle-knife, papillotome | No AEs were observed in 70 patients (85.4%). Bleeding occurred in seven patients (31.8%) after cutting with a needle-knife papillotome and in one patient (8.3 %) after grasping. No bleeding was recorded after using a standard papillotome or a bougie ( $p<0.05$ ). Ten of 22 patients (45.5%) treated with the needle-knife had a serious AE and one patient died (4.5 %). |
| El Ali         | 2011 | Belgium | 2002–2009    | Retrospective cohort                 | 879                             | NA                                       | Only eight patients (8/879; 0.9%) developed BBS. Five patients underwent successful treatment with Cruciform mucosal incisions with needle-knife. No complications were observed                                                                                                                                                                                                |
| Dowman         | 2015 | UK      | 2009–2013    | Retrospective                        | 58                              | Corflo vs Freka PEG tube                 | Increased risk of buried bumper syndrome with Freka PEG tubes when compared to Corflo PEG tubes.                                                                                                                                                                                                                                                                                |

NA, not applicable; AE, adverse event; BBS, buried bumper syndrome; PEG, percutaneous endoscopic gastrostomy.

**Supplementary Table 7.** Summary of Evidence for Replacement of Gastrostomy Tube

| First author and year | Country | Study period  | Study design       | Timing of replacement                     | Number of participants                                                     | Number of total replacements | Tube type                   | Method of replacement                | Number of routine or short interval replacements | Number of on-demand or long interval replacements | Main outcomes                                                                                                                                                                                          | Comparison (routine vs on-demand)                                                                                            |
|-----------------------|---------|---------------|--------------------|-------------------------------------------|----------------------------------------------------------------------------|------------------------------|-----------------------------|--------------------------------------|--------------------------------------------------|---------------------------------------------------|--------------------------------------------------------------------------------------------------------------------------------------------------------------------------------------------------------|------------------------------------------------------------------------------------------------------------------------------|
| Nishiwaki 2011        | Japan   | 2000–2010     | Retrospective      | Routine replacement (4–8 mo) or on-demand | 317                                                                        | 1,092                        | Internal bloater            | Percutaneous traction                | 1,070                                            | 22                                                | 13 complications associated with replacement (1.2%); fistular disruption: 8 (0.7%), hemorrhage: 4 (0.4%); device breakage: 1 (0.1%)                                                                    | No differences in complications between routine and on-demand replacement (data not presented)                               |
| Lee 2013              | Korea   | 2008–2012     | Retrospective      | Routine replacement or on-demand          | 330                                                                        | N/A                          | Internal bloater            | Percutaneous (154), endoscopic (176) | 264                                              | 66 (37: PEG site infection, 14: leakage)          | 1) Immediate complication 16 (4.8%); laceration 13 (3.9%); bleeding 2 (0.1%); perforation 1 (0.03%).<br>2) Late complications 8 (2.4%): infection 5 (1.5%), leakage 3 (0.9%)                           | Short interval of replacement (≤6 mo) shows higher mechanical complication than long interval (>6 mo): 11 (6.3%) vs 3 (1.9%) |
| Jo 2014               | Korea   | 2009–2014     | Retrospective      | On-demand                                 | 72 (30: displacement, 22: obstruction, 10: leakage, 8: PEG site infection) | NA                           | Internal bloater            | NA                                   | 57 (early replacement)                           | 15 (late replacement)                             | The “early exchange” group had a lower BMI than “late exchange” group (19.7±3.57 vs 22.4±3.87). Reason of replacement was not different between two groups.                                            | Replacement associated complications were not analyzed between the two groups (Reason of replacement is analyzed).           |
| Lisotti 2019          | Italy   | 2016–2018     | Prospective cohort | Routine replacement or on-demand          | 99                                                                         | 234                          | Balloon type                | NA                                   | 203                                              | 31                                                | Among 203 elective tube placements, 197 (97.0%) have been performed at home. No adverse events were reported.                                                                                          | Comparison between routine vs on-demand replacement was not presented.                                                       |
| Sbeit 2021            | Israel  | Not presented | Retrospective      | On-demand                                 | 48 (leak: 20, obstruction: 10, dislodgement: 18)                           | NA                           | Bumper type or balloon type | NA                                   | 22                                               | 26                                                | No difference of PEG-related long-term complication (leak: 8/22 vs 12/26, p=0.057; obstruction: 5/22 vs 5/26, p=0.72; dislodgement: 9/22 vs 9/26, p=0.76) between replacement within 6 vs beyond 6 mo. | Replacement associated complications are not presented between two groups (Reason of replacement is analyzed).               |

PEG, percutaneous endoscopic gastrostomy; BMI, body mass index; NA, not applicable.

**Supplementary Table 8.** Summary of Evidence for Removal of Gastrostomy Tube Using "Cut-and-Push" Technique

| First author | Year | Country | Study period  | Study design       | Number of participants | Type of tube (size not presented)      | Number of "cut and push" method | Number of endoscopic removal | Follow-up protocol                                          | Follow-up duration | Main results                                                                                                                                                                                                                                | Comparison between "cut and push" technique vs endoscopic removal |
|--------------|------|---------|---------------|--------------------|------------------------|----------------------------------------|---------------------------------|------------------------------|-------------------------------------------------------------|--------------------|---------------------------------------------------------------------------------------------------------------------------------------------------------------------------------------------------------------------------------------------|-------------------------------------------------------------------|
| Korula       | 1991 | USA     | 1988–1990     | Prospective cohort | 64                     | Internal bloster (size not presented)  | 63                              | 1                            | Radiographs of abdomen on 7 to 14 day after tube placement  | 4–200 day          | Radiograph was taken in 57: complete elimination of tube: 84% (48/57), tube in colon: 14% (8/57) → one in stool. Radiograph was not taken in 14: one in stool. Tube retention and additional endoscopic removal in one patient (1.6%, 1/63) | NA                                                                |
| Pearce       | 2000 | UK      | 1995–1999     | Retrospective      | 80                     | 9–15 F                                 | 73                              | 7                            | No routine radiographs                                      | Not presented      | Two (2.7%) complications in "cut and push" group: stuck in abdominal wall, abdominal pain                                                                                                                                                   | NA (complication of endoscopic removal was not presented)         |
| Merrick      | 2008 | UK      | Not presented | Prospective cohort | 42                     | Internal bloster, 15 F                 | 42                              | 0                            | Radiographs of abdomen on day 7 and 14 after tube placement | 7–14 day           | 41 (97.6%) passed the remnant by day 8 and all by day 14. No adverse events occurred.                                                                                                                                                       | NA                                                                |
| Kejariwal    | 2009 | UK      | 2002–2007     | Retrospective      | 89                     | Internal bloster, 15 F                 | 89                              | 0                            | No routine radiographs                                      | 26.8 mo (1–66)     | No minor and major complications                                                                                                                                                                                                            | NA                                                                |
| Agha         | 2013 | Italy   | 2009–2011     | Prospective cohort | 79                     | Internal bloster, 20 F (57), 24 F (22) | 79                              | 0                            | No routine radiographs                                      | Up to 12 mo        | 74 (93.6%) tubes passed through the intestine within 7 day. No serious complications were reported.                                                                                                                                         | NA                                                                |

NA, not applicable



**Supplementary Table 9.** Summary of Evidence for Effects of CO<sub>2</sub> Gas

| First author | Year | Country | Study period | Study design                                  | Number of participants | Comparison                      | Main outcome                                                                                                                                                                                                                                                                                                                                                                                                    |
|--------------|------|---------|--------------|-----------------------------------------------|------------------------|---------------------------------|-----------------------------------------------------------------------------------------------------------------------------------------------------------------------------------------------------------------------------------------------------------------------------------------------------------------------------------------------------------------------------------------------------------------|
| Allen        | 2017 | Georgia | 2015–2016    | Retrospective                                 | 257                    | Desufflation vs no desufflation | PNP rate on POD1 in CXR: Desufflation group 14.8%, no desufflation group 7.9%, $p>0.05$ .                                                                                                                                                                                                                                                                                                                       |
| Murphy       | 2016 | USA     | 2012–2014    | Prospective, double-blind Randomized trial    | 35                     | CO <sub>2</sub> vs air          | PNP 2/14 (14.3 %) using CO <sub>2</sub> and 8/15 (53.3 %) using ambient air ( $p=0.05$ ).<br>No significant difference in abdominal distention, VAS scores for pain or bloating between CO <sub>2</sub> and ambient air.                                                                                                                                                                                        |
| Nishiwaki    | 2012 | Japan   | 2009–2011    | Comparative Study Randomized controlled trial | 60                     | CO <sub>2</sub> vs air          | PNP was observed only in the air group but not in the CO <sub>2</sub> group ( $p=0.003$ ).<br>The evaluation of bowel distension on abdominal X ray revealed a significant decrease of small bowel distension in the CO <sub>2</sub> group compared to the air group ( $p<0.001$ ) at 10 min and 24 hr after PEG, whereas there was no significant difference in large bowel distension between the two groups. |
| Gottfried    | 1986 | USA     | 1982–1983    | Observational                                 | 24                     | NA                              | Nine patients (38%) developed radiologic PNP. Five patients (21%) had gross evidence of PNP, three patients had more subtle findings of small amounts of free air, and one patient had free air found by CT scan. No patient developed signs or symptoms of peritoneal inflammation.                                                                                                                            |

PNP, pneumoperitoneum; POD, postoperative day; CXR, chest X-ray; VAS, visual analog scale; PEG, percutaneous endoscopic gastrostomy; CT, computed tomography; NA, not applicable.

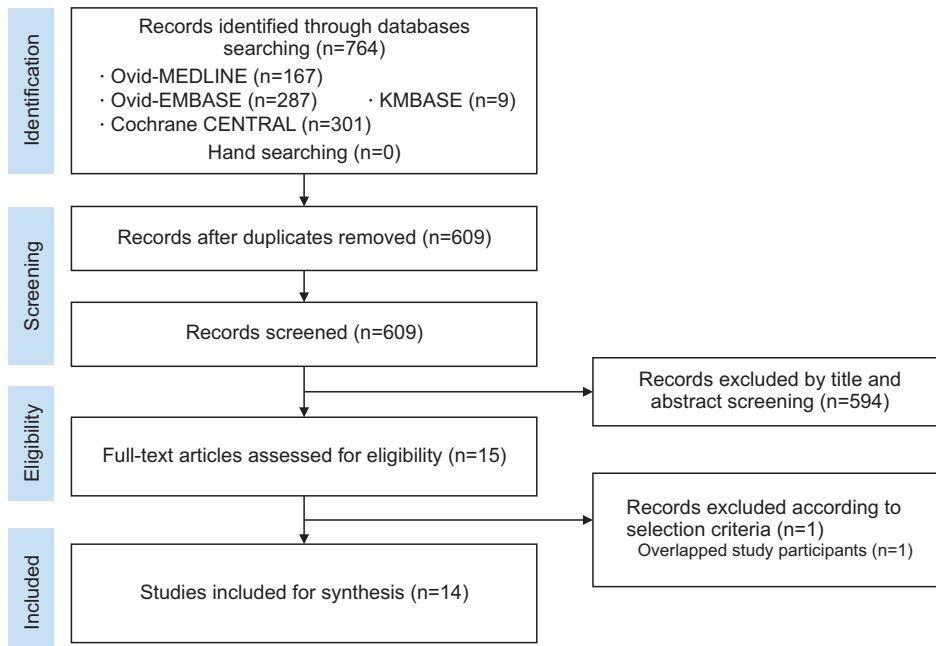

**Supplementary Fig. 1.** PRISMA flow diagram of prophylactic antibiotic use.

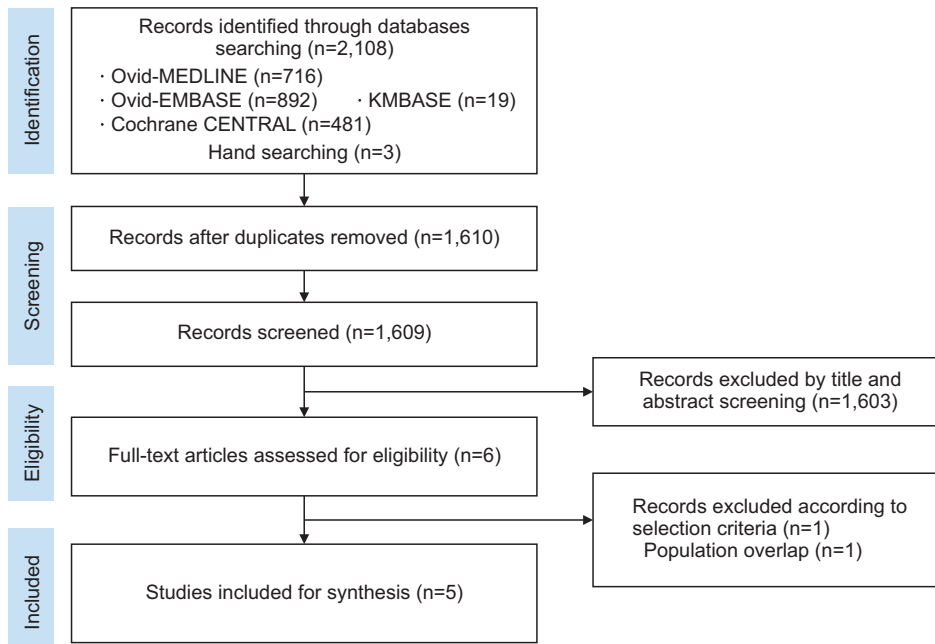

Supplementary Fig. 2. PRISMA flow diagram of feeding timing.

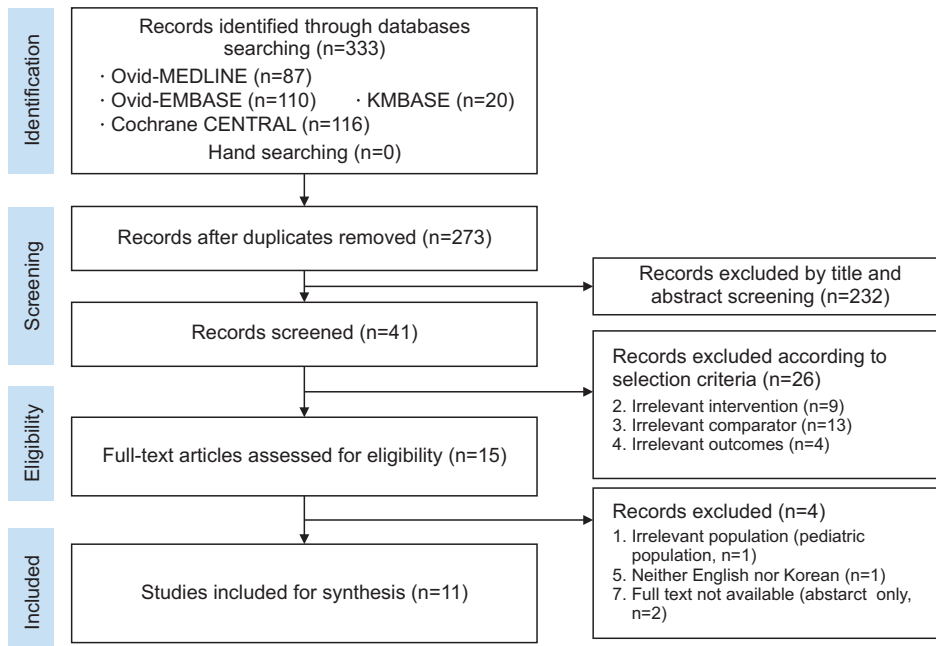

**Supplementary Fig. 3.** PRISMA flow diagram of percutaneous endoscopic gastrostomy techniques.

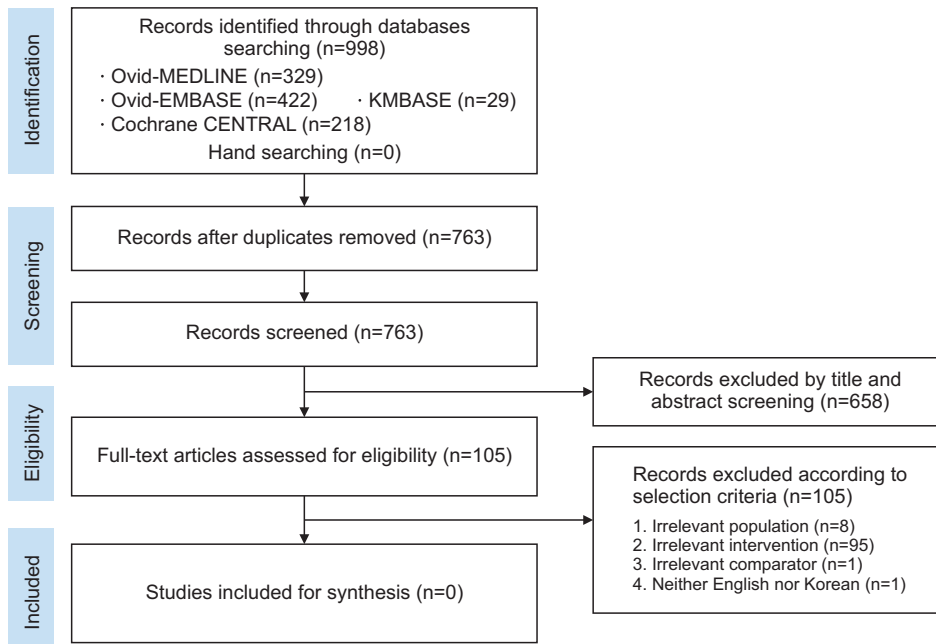

**Supplementary Fig. 4.** PRISMA flow diagram of peristomal leakage.

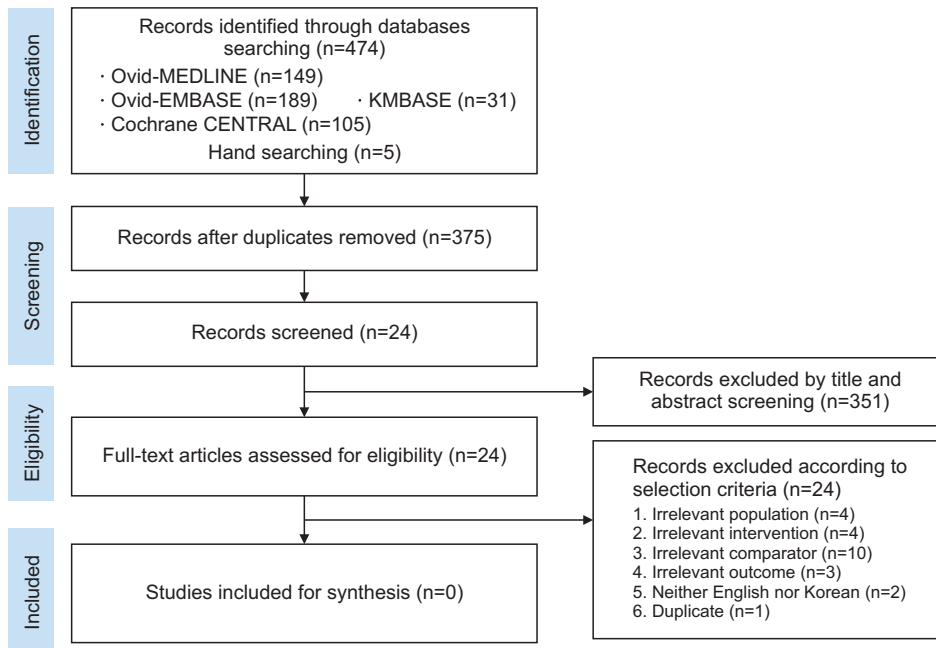

**Supplementary Fig. 5.** PRISMA flow diagram of gastrostomy tube breakage, occlusion, dislodgement, or degradation.

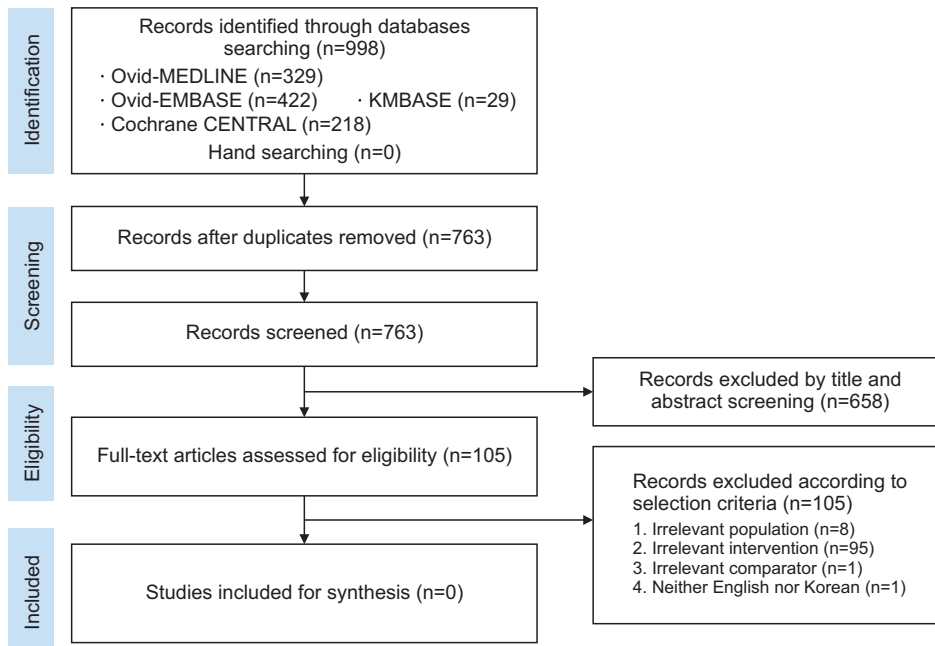

**Supplementary Fig. 6.** PRISMA flow diagram of the management of adverse events.

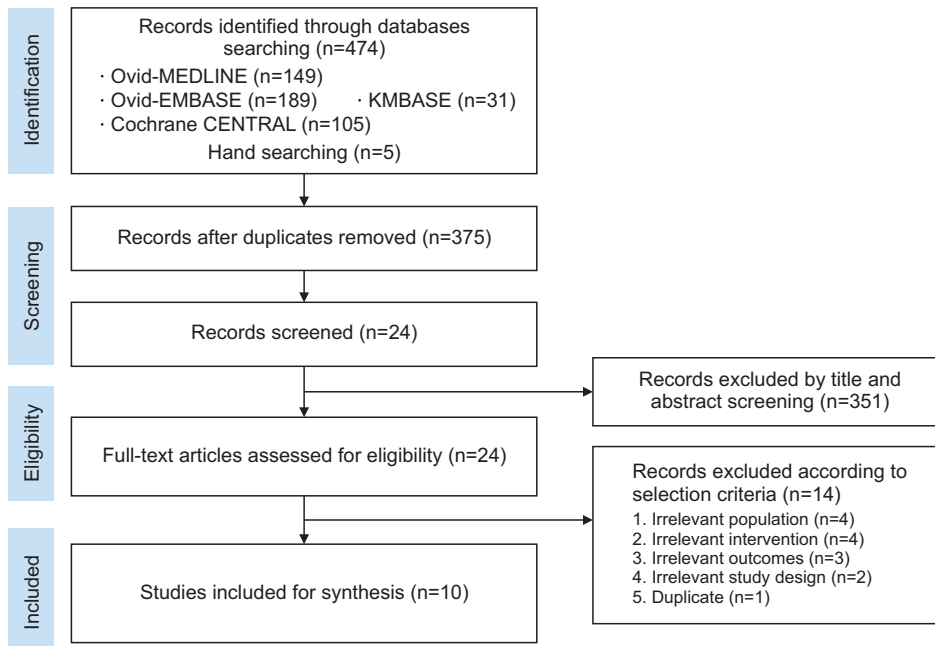

**Supplementary Fig. 7.** PRISMA flow diagram of replacement or removal of gastrostomy tube.
